# Supplementary material for: A closer look at the high burden of psychiatric disorders among healthcare workers in Egypt during the COVID-19 pandemic
Source: PubMed Central journal article supplement (PMC8602011; doi:10.4178/epih.e2021045), 2021-07-13

**Supplementary Material 12. The prevalence of severe stress represented by the event rate and the corresponding 95% confidence interval (CI)**

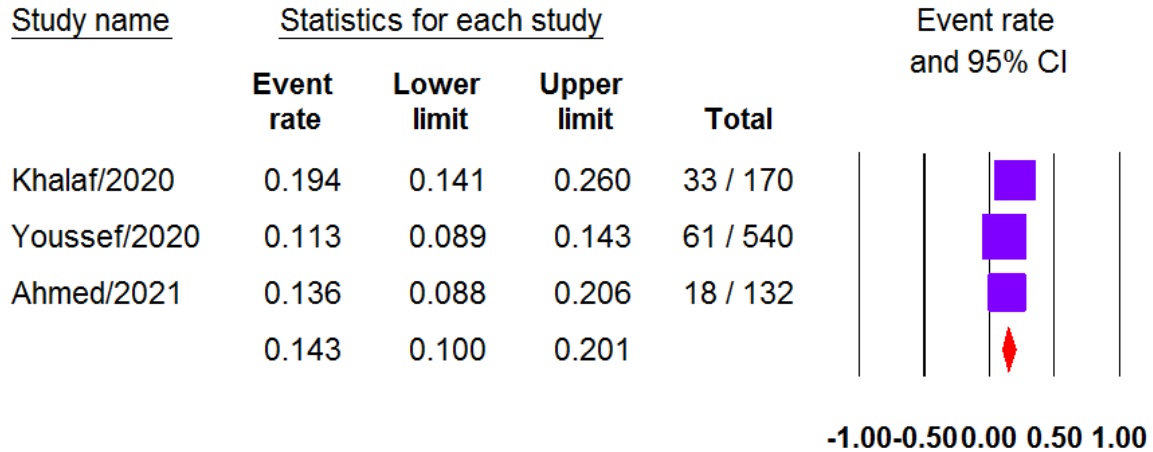

**Supplementary Material 13. The prevalence of very severe stress represented by the event rate and the corresponding 95% confidence interval (CI)**

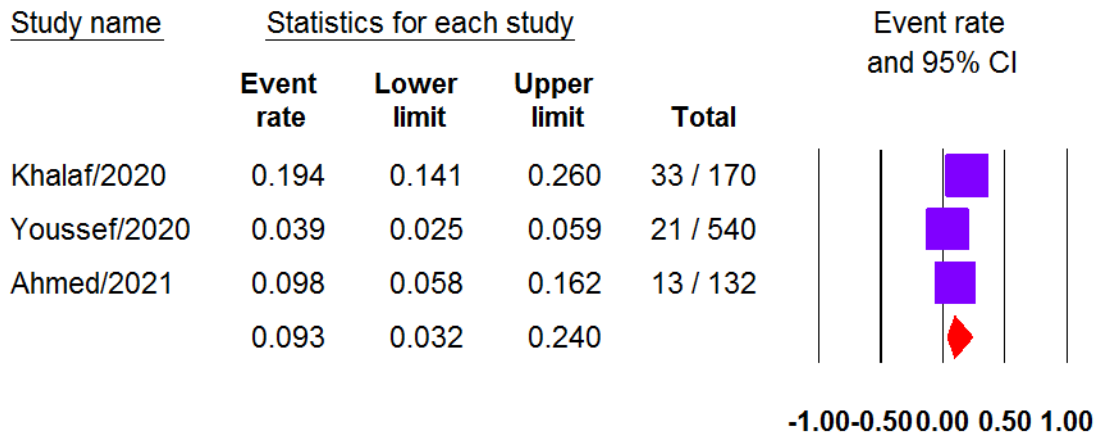

Supplement: epih-43-e2021045-suppl7.pdf [file epih-43-e2021045-suppl7.pdf]
